# Supplementary material for: Multimorbidity patterns and risk of frailty in older community-dwelling adults: a population-based cohort study
Source: PubMed Central journal article supplement — Age Ageing. 2021 Jul 3;50(6):2183–91. doi: 10.1093/ageing/afab138 (PMC8581386; doi:10.1093/ageing/afab138), 2021-07-03
Supplement: aa-20-1683-file002_afab138.pdf [file aa-20-1683-file002_afab138.pdf]

# **Multimorbidity Patterns and Risk of Frailty in Older Community-Dwelling Adults: A Population-Based Cohort Study**

## **Supplemental Material**

**Supplementary Figure S1:** Study population derived from SNAC-K

**Supplementary Table S1:** Baseline characteristics by missing physical frailty status (n=2741)

**Supplementary Table S2:** Prevalence, observed/expected ratio, and exclusivity of diseases within multimorbidity patterns

**Supplementary Table S3:** Prevalence of chronic diseases in study population at baseline (n=2534)

**Supplementary Table S4:** Six- (n=2122) and 12- (n=2140) year associations between multimorbidity patterns and physical frailty, death, and dropping out in complete cases

**Supplementary Table S5:** Cross-sectional (n=2741) and longitudinal associations (n=2423) between multimorbidity patterns and physical frailty in imputed population at six and 12 years

**Supplementary Table S6:** Cross-sectional (n=2534) and six (n=2122) and 12 (n=2140) year longitudinal associations of multimorbidity patterns with frailty in complete cases by sex and age

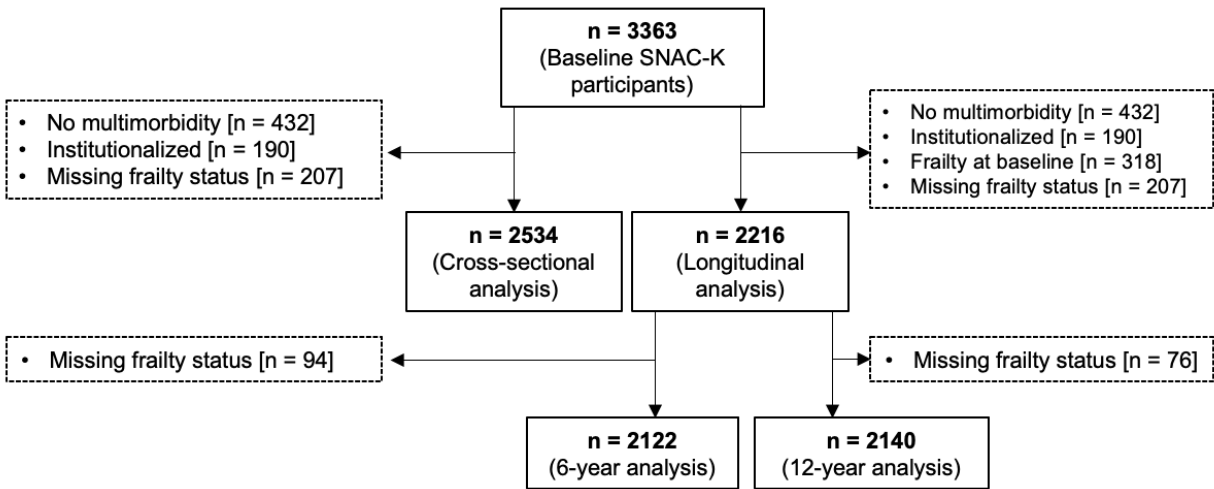

**Supplementary Figure S1: Study population derived from SNAC-K**

**Supplementary Table S1: Baseline characteristics by missing physical frailty status (n=2741)**

| <b>Characteristics</b>    | <b>Not missing frailty<br/>(n = 2534)</b> | <b>Missing frailty<br/>(n = 207)</b> | <b>p-value</b> |
|---------------------------|-------------------------------------------|--------------------------------------|----------------|
| Age (years)               | 74.3 ± 10.3                               | 85.9 ± 8.5                           | < 0.001        |
| Sex (female)              | 1631 (64.4)                               | 158 (76.3)                           | 0.001          |
| Education                 |                                           |                                      |                |
| Elementary                | 437 (17.3)                                | 54 (27.4)                            | < 0.001        |
| High school               | 1270 (50.2)                               | 120 (60.9)                           | 0.004          |
| University                | 825 (32.6)                                | 23 (11.7)                            | < 0.001        |
| Civil status              |                                           |                                      |                |
| Partnered                 | 1158 (45.7)                               | 49 (24.5)                            | < 0.001        |
| Widowed                   | 664 (26.2)                                | 101 (50.5)                           | < 0.001        |
| Unmarried                 | 371 (14.7)                                | 27 (13.5)                            | 0.656          |
| Divorced                  | 339 (13.4)                                | 23 (11.5)                            | 0.448          |
| Alcohol consumption       |                                           |                                      |                |
| Never/occasional          | 913 (36.3)                                | 125 (66.8)                           | < 0.001        |
| Light/moderate            | 1186 (47.1)                               | 49 (26.2)                            | < 0.001        |
| Heavy                     | 419 (16.6)                                | 13 (7.0)                             | < 0.001        |
| Smoking status            |                                           |                                      |                |
| Never                     | 1187 (47.1)                               | 109 (57.4)                           | 0.006          |
| Former                    | 968 (38.4)                                | 61 (32.1)                            | 0.083          |
| Current                   | 364 (14.5)                                | 20 (10.5)                            | 0.135          |
| Number of diseases        | 4.3 ± 2.1                                 | 6.2 ± 2.7                            | < 0.001        |
| Mortality                 |                                           |                                      |                |
| Deceased within six years | 528 (20.8)                                | 125 (60.4)                           | < 0.001        |
| Deceased within 12 years  | 715 (28.2)                                | 153 (73.9)                           | < 0.001        |
| Diseases                  |                                           |                                      |                |
| Anemia                    | 301 (11.9)                                | 58 (28.0)                            | < 0.001        |
| Atrial Fibrillation       | 247 (9.8)                                 | 41 (19.8)                            | < 0.001        |
| Cerebrovascular disease   | 179 (7.1)                                 | 37 (17.9)                            | < 0.001        |
| Chronic Kidney Disease    | 942 (37.2)                                | 117 (56.5)                           | < 0.001        |
| COPD                      | 129 (5.1)                                 | 22 (10.6)                            | 0.001          |
| Dementia                  | 105 (4.1)                                 | 61 (29.5)                            | < 0.001        |
| Depression                | 243 (9.6)                                 | 33 (15.9)                            | 0.003          |
| Diabetes                  | 249 (9.8)                                 | 27 (13.0)                            | 0.139          |
| Heart Failure             | 242 (9.6)                                 | 59 (28.5)                            | < 0.001        |
| Hypertension              | 1936 (76.4)                               | 140 (67.6)                           | 0.005          |
| Ischemic Heart Disease    | 406 (16.0)                                | 57 (27.5)                            | < 0.001        |
| Solid Neoplasms           | 252 (9.9)                                 | 28 (13.5)                            | 0.102          |

Notes: COPD = chronic obstructive pulmonary disease. Values are presented as absolute number and column percentage (%) or mean ± standard deviation.

**Supplementary Table S2:** Prevalence, observed/expected ratio, and exclusivity of diseases within multimorbidity patterns

| Multimorbidity pattern      | Disease                                          | Prevalence within pattern (%) | Observed / Expected Ratio | Exclusivity (%) |
|-----------------------------|--------------------------------------------------|-------------------------------|---------------------------|-----------------|
| Psychiatric                 | Neurotic, stress-related and somatoform diseases | 54.45                         | 15.55                     | 95              |
|                             | Depression and mood diseases                     | 82.57                         | 8.20                      | 50              |
|                             | Other neurological diseases                      | 6.00                          | 2.89                      | 18              |
|                             | Asthma                                           | 17.54                         | 2.45                      | 15              |
|                             | Sleep disorders                                  | 5.48                          | 2.28                      | 14              |
|                             | Colitis and related diseases                     | 26.82                         | 2.23                      | 14              |
|                             | Migraine and facial pain syndromes               | 4.95                          | 1.97                      | 12              |
|                             | Other musculoskeletal and joint diseases         | 12.50                         | 1.80                      | 11              |
|                             | COPD, emphysema, chronic bronchitis              | 9.12                          | 1.65                      | 10              |
|                             | Esophagus, stomach and duodenum diseases         | 7.86                          | 1.58                      | 10              |
| Cardio., Anemia, & Dementia | Bradycardias and conduction diseases             | 18.88                         | 9.08                      | 80              |
|                             | Other cardiovascular diseases                    | 25.51                         | 6.92                      | 61              |
|                             | Heart failure                                    | 71.59                         | 6.52                      | 57              |
|                             | Cardiac valve diseases                           | 17.82                         | 6.11                      | 54              |
|                             | Atrial fibrillation                              | 58.23                         | 5.54                      | 49              |
|                             | Cerebrovascular disease                          | 26.74                         | 3.39                      | 30              |
|                             | Ischemic heart disease                           | 51.85                         | 3.07                      | 27              |
|                             | Anemia                                           | 37.25                         | 2.84                      | 25              |
| Sensory & Cancer            | Dementia                                         | 17.20                         | 2.84                      | 25              |
|                             | Inflammatory arthropathies                       | 11.71                         | 2.57                      | 23              |
|                             | Cataract and other lens diseases                 | 35.98                         | 5.87                      | 69              |
|                             | Blindness, visual impairment                     | 24.40                         | 5.72                      | 67              |
|                             | Other eye diseases                               | 33.09                         | 5.70                      | 67              |
|                             | Glaucoma                                         | 26.79                         | 4.42                      | 52              |
|                             | Deafness, hearing impairment                     | 34.82                         | 3.00                      | 35              |
|                             | Solid neoplasms                                  | 21.93                         | 2.15                      | 25              |
|                             | Other genitourinary diseases                     | 5.67                          | 1.97                      | 23              |
|                             | Dementia                                         | 11.83                         | 1.95                      | 23              |
| Metabolic & Sleep           | Anemia                                           | 22.77                         | 1.74                      | 20              |
|                             | Chronic kidney diseases                          | 65.36                         | 1.69                      | 20              |
|                             | Diabetes                                         | 37.96                         | 3.77                      | 42              |
|                             | Sleep disorders                                  | 7.62                          | 3.16                      | 36              |
|                             | Obesity                                          | 38.64                         | 2.79                      | 31              |
|                             | Ischemic heart disease                           | 33.50                         | 1.98                      | 22              |
|                             | Inflammatory arthropathies                       | 9.02                          | 1.98                      | 22              |
|                             | Other cardiovascular diseases                    | 6.34                          | 1.72                      | 19              |
|                             | Dementia                                         | 10.29                         | 1.70                      | 19              |
|                             | Prostate diseases                                | 7.56                          | 1.63                      | 18              |

| Multimorbidity pattern                               | Disease                                              | Prevalence within pattern (%) | Observed / Expected Ratio | Exclusivity (%) |
|------------------------------------------------------|------------------------------------------------------|-------------------------------|---------------------------|-----------------|
| Metabolic & Sleep<br>(continued)                     | COPD, emphysema, chronic bronchitis                  | 8.17                          | 1.48                      | 17              |
|                                                      | Heart failure                                        | 16.13                         | 1.47                      | 16              |
| MSK, Resp., & GI                                     | Osteoporosis                                         | 31.41                         | 4.26                      | 67              |
|                                                      | Dorsopathies                                         | 21.80                         | 2.93                      | 46              |
|                                                      | Esophagus, stomach and duodenum diseases             | 14.21                         | 2.86                      | 45              |
|                                                      | Asthma                                               | 19.98                         | 2.79                      | 44              |
|                                                      | COPD, emphysema, chronic bronchitis                  | 12.77                         | 2.32                      | 37              |
|                                                      | Autoimmune diseases                                  | 11.67                         | 2.28                      | 36              |
|                                                      | Inflammatory arthropathies                           | 9.07                          | 1.99                      | 31              |
|                                                      | Thyroid diseases                                     | 22.74                         | 1.96                      | 31              |
|                                                      | Colitis and related diseases                         | 22.95                         | 1.91                      | 30              |
|                                                      | Osteoarthritis and other degenerative joint diseases | 27.58                         | 1.88                      | 30              |
|                                                      | Unspecific                                           | Dyslipidemia                  | 67.35                     | 1.28            |
| Hypertension                                         |                                                      | 84.61                         | 1.12                      | 52              |
| Obesity                                              |                                                      | 13.07                         | 0.94                      | 44              |
| Prostate diseases                                    |                                                      | 4.29                          | 0.93                      | 43              |
| Other musculoskeletal and joint diseases             |                                                      | 5.83                          | 0.84                      | 39              |
| Other genitourinary diseases                         |                                                      | 2.42                          | 0.84                      | 39              |
| Solid neoplasms                                      |                                                      | 7.86                          | 0.77                      | 36              |
| Migraine and facial pain syndromes                   |                                                      | 1.88                          | 0.75                      | 35              |
| Thyroid diseases                                     |                                                      | 8.56                          | 0.74                      | 34              |
| Osteoarthritis and other degenerative joint diseases |                                                      | 10.63                         | 0.72                      | 34              |

Notes: COPD = chronic obstructive pulmonary disease; Cardio., Anemia, & Dementia = Cardiovascular Diseases, Anemia, & Dementia; Sensory & Cancer = Sensory Impairments & Cancer; Metabolic & Sleep = Metabolic & Sleep Disorders; MSK, Resp., & GI = Musculoskeletal, Respiratory, & Gastrointestinal Diseases. Shaded cells refer to Observed/Expected ratios > 2 and Exclusivity ≥ 25.

**Supplementary Table S3:** Prevalence of chronic diseases in study population at baseline (n=2534)

| <b>Disease</b>                                       | <b>Number</b> | <b>Prevalence (%)</b> |
|------------------------------------------------------|---------------|-----------------------|
| Hypertension                                         | 1936          | 76                    |
| Dyslipidemia                                         | 1369          | 54                    |
| Chronic kidney diseases                              | 942           | 37                    |
| Ischemic heart disease                               | 406           | 16                    |
| Osteoarthritis and other degenerative joint diseases | 374           | 15                    |
| Obesity                                              | 369           | 15                    |
| Anemia                                               | 301           | 12                    |
| Thyroid diseases                                     | 291           | 11                    |
| Colitis and related diseases                         | 278           | 11                    |
| Deafness, hearing impairment                         | 262           | 10                    |
| Solid neoplasms                                      | 252           | 10                    |
| Diabetes                                             | 249           | 10                    |
| Atrial Fibrillation                                  | 247           | 10                    |
| Depression and mood diseases                         | 243           | 10                    |
| Heart failure                                        | 242           | 10                    |
| Dorsopathies                                         | 191           | 8                     |
| Cerebrovascular disease                              | 179           | 7                     |
| Asthma                                               | 178           | 7                     |
| Osteoporosis                                         | 176           | 7                     |
| Other musculoskeletal and joint diseases             | 164           | 6                     |
| Cataract and other lens diseases                     | 146           | 6                     |
| Glaucoma                                             | 142           | 6                     |
| Other eye diseases                                   | 140           | 6                     |
| COPD, emphysema, chronic bronchitis                  | 129           | 5                     |
| Esophagus, stomach and duodenum diseases             | 126           | 5                     |
| Autoimmune diseases                                  | 125           | 5                     |
| Prostate diseases                                    | 119           | 5                     |
| Inflammatory Arthropathies                           | 112           | 4                     |
| Dementia                                             | 105           | 4                     |
| Other cardiovascular diseases                        | 89            | 4                     |
| Blindness, visual impairment                         | 85            | 3                     |
| Neurotic, stress-related and somatoform diseases     | 85            | 3                     |
| Other genitourinary diseases                         | 74            | 3                     |
| Cardiac valve diseases                               | 70            | 3                     |
| Sleep disorders                                      | 61            | 2                     |
| Migraine and facial pain syndromes                   | 60            | 2                     |
| Other neurological diseases                          | 51            | 2                     |
| Bradycardias and conduction diseases                 | 47            | 2                     |

Notes: COPD = chronic obstructive pulmonary disease

**Supplementary Table S4:** Six- (n=2122) and 12- (n=2140) year associations between multimorbidity patterns and physical frailty, death, and dropping out in complete cases

| Pattern                     | Six-year |           | 12-year |            |
|-----------------------------|----------|-----------|---------|------------|
|                             | RRR      | 95% CI    | RRR     | 95% CI     |
| <b>Frail</b>                |          |           |         |            |
| Unspecific                  | 1 (ref)  | -         | 1 (ref) | -          |
| MSK, Resp., & GI            | 1.22     | 0.78-1.92 | 1.38    | 0.94-2.03  |
| Metabolic & Sleep           | 1.99     | 1.25-3.16 | 1.43    | 0.93-2.19  |
| Sensory & Cancer            | 1.36     | 0.82-2.25 | 1.87    | 1.05-3.35  |
| Cardio., Anemia, & Dementia | 2.25     | 1.13-4.49 | 4.81    | 1.59-14.60 |
| Psychiatric                 | 3.04     | 1.59-5.79 | 2.62    | 1.45-4.72  |
| <b>Deceased</b>             |          |           |         |            |
| Unspecific                  | 1 (ref)  | -         | 1 (ref) | -          |
| MSK, Resp., & GI            | 1.19     | 0.78-1.83 | 1.05    | 0.70-1.57  |
| Metabolic & Sleep           | 2.03     | 1.33-3.09 | 1.49    | 0.98-2.27  |
| Sensory & Cancer            | 1.46     | 0.92-2.31 | 1.58    | 0.89-2.81  |
| Cardio., Anemia, & Dementia | 4.79     | 2.68-8.57 | 7.98    | 2.71-23.49 |
| Psychiatric                 | 2.00     | 1.03-3.90 | 2.29    | 1.24-4.23  |
| <b>Dropped out</b>          |          |           |         |            |
| Unspecific                  | 1 (ref)  | -         | 1 (ref) | -          |
| MSK, Resp., & GI            | 0.99     | 0.68-1.45 | 1.13    | 0.79-1.61  |
| Metabolic & Sleep           | 1.36     | 0.91-2.02 | 1.14    | 0.77-1.71  |
| Sensory & Cancer            | 0.90     | 0.54-1.50 | 1.21    | 0.66-2.19  |
| Cardio., Anemia, & Dementia | 1.64     | 0.82-3.30 | 3.52    | 1.15-10.81 |
| Psychiatric                 | 1.57     | 0.90-2.73 | 1.86    | 1.08-3.21  |

Notes: MSK, Resp., & GI = Musculoskeletal, Respiratory, & Gastrointestinal Diseases; Metabolic & Sleep = Metabolic & Sleep Disorders; Sensory & Cancer = Sensory Impairments & Cancer; Cardio., Anemia, & Dementia = Cardiovascular Diseases, Anemia, & Dementia; RRR = relative risk ratio. Missing six-year analysis observations: education (n=1), civil status (n=2), alcohol consumption (n=8), smoking status (n=11). Missing 12-year analysis observations: education (n=1), civil status (n=1), alcohol consumption (n=9), smoking status (n=10). Model adjusted for age, sex, education, civil status, smoking status, and alcohol consumption. Reference outcome is non-frail participants who did not die or drop out at six or 12 years.

**Supplementary Table S5:** Cross-sectional (n=2741) and longitudinal associations (n=2423) between multimorbidity patterns and physical frailty in imputed population at six and 12 years

| <b>Pattern</b>              | <b>Cases</b> |          | <b>Model 1</b> |               | <b>Model 2</b> |               |
|-----------------------------|--------------|----------|----------------|---------------|----------------|---------------|
| <b>Cross-sectional</b>      | <b>n/N</b>   | <b>%</b> | <b>OR</b>      | <b>95% CI</b> | <b>OR</b>      | <b>95% CI</b> |
| Unspecific                  | 63 / 1245    | 5.1      | 1 (ref)        | -             | 1 (ref)        | -             |
| MSK, Resp., & GI            | 80 / 435     | 18.3     | 3.13           | 2.13-4.62     | 3.07           | 2.07-4.54     |
| Metabolic & Sleep           | 28 / 306     | 9.0      | 1.77           | 1.05-2.97     | 1.67           | 0.99-2.82     |
| Sensory & Cancer            | 95 / 344     | 27.6     | 2.62           | 1.75-3.90     | 2.44           | 1.62-3.67     |
| Cardio., Anemia, & Dementia | 107 / 245    | 43.5     | 5.58           | 3.66-8.51     | 5.31           | 3.46-8.13     |
| Psychiatric                 | 35 / 166     | 21.0     | 5.21           | 2.94-9.26     | 5.10           | 2.85-9.10     |
| <b>Six-year</b>             | <b>n/N</b>   | <b>%</b> | <b>RRR</b>     | <b>95% CI</b> | <b>RRR</b>     | <b>95% CI</b> |
| Unspecific                  | 102 / 1189   | 8.6      | 1 (ref)        | -             | 1 (ref)        | -             |
| MSK, Resp., & GI            | 50 / 369     | 13.7     | 1.35           | 0.89-2.05     | 1.34           | 0.88-2.04     |
| Metabolic & Sleep           | 38 / 281     | 13.7     | 1.94           | 1.22-3.07     | 1.94           | 1.22-3.08     |
| Sensory & Cancer            | 59 / 275     | 21.3     | 1.33           | 0.85-2.06     | 1.30           | 0.83-2.02     |
| Cardio., Anemia, & Dementia | 31 / 169     | 18.5     | 2.44           | 1.21-4.94     | 2.35           | 1.14-4.82     |
| Psychiatric                 | 24 / 140     | 17.3     | 3.36           | 1.88-6.01     | 3.27           | 1.81-5.90     |
| <b>12-year</b>              | <b>n/N</b>   | <b>%</b> | <b>RRR</b>     | <b>95% CI</b> | <b>RRR</b>     | <b>95% CI</b> |
| Unspecific                  | 204 / 1189   | 17.2     | 1 (ref)        | -             | 1 (ref)        | -             |
| MSK, Resp., & GI            | 88 / 369     | 24.0     | 1.49           | 1.00-2.22     | 1.44           | 0.96-2.15     |
| Metabolic & Sleep           | 62 / 281     | 21.9     | 1.55           | 0.98-2.44     | 1.51           | 0.96-2.38     |
| Sensory & Cancer            | 83 / 275     | 30.3     | 2.18           | 1.18-4.03     | 2.07           | 1.10-3.88     |
| Cardio., Anemia, & Dementia | 37 / 169     | 22.0     | 6.18           | 2.06-18.52    | 5.64           | 1.89-16.82    |
| Psychiatric                 | 31 / 140     | 22.4     | 2.55           | 1.43-4.54     | 2.37           | 1.32-4.24     |

Notes: MSK, Resp., & GI = Musculoskeletal, Respiratory, & Gastrointestinal Diseases; Metabolic & Sleep = Metabolic & Sleep Disorders; Sensory & Cancer = Sensory Impairments & Cancer; Cardio., Anemia, & Dementia = Cardiovascular Diseases, Anemia, & Dementia; OR = odds ratio, RRR = relative risk ratio. Figures reported are based on five imputed datasets. Imputed observations in cross-sectional model: civil status (n=9), education (n=12), smoking status (n=32), alcohol consumption (n=36), baseline frailty status (n=207). Imputed observations in longitudinal model: civil status (n=9), education (n=11), smoking status (n=28), alcohol consumption (n=29), six-year frailty status (n=301), 12-year frailty status (n=283). Model 1: adjusted for age, sex, and education. Model 2: adjusted for age, sex, education, civil status, smoking status, and alcohol consumption.



**Supplementary Table S6:** Cross-sectional (n=2534) and six (n=2122) and 12 (n=2140) year longitudinal associations of multimorbidity patterns with frailty in complete cases by sex and age

| Pattern                     | Cross-sectional |            | Six-year |            | 12-year |            |
|-----------------------------|-----------------|------------|----------|------------|---------|------------|
|                             | OR              | 95% CI     | RRR      | 95% CI     | RRR     | 95% CI     |
| <b>Female</b>               |                 |            |          |            |         |            |
| Unspecific                  | 1 (ref)         | -          | 1 (ref)  | -          | 1 (ref) | -          |
| MSK, Resp., & GI            | 2.97            | 1.82-4.82  | 1.21     | 0.71-2.04  | 1.39    | 0.88-2.19  |
| Metabolic & Sleep           | 1.64            | 0.80-3.35  | 1.82     | 0.94-3.53  | 1.44    | 0.77-2.70  |
| Sensory & Cancer            | 2.53            | 1.50-4.25  | 1.37     | 0.73-2.59  | 1.86    | 0.91-3.77  |
| Cardio., Anemia, & Dementia | 6.57            | 3.85-11.21 | 3.34     | 1.42-7.84  | 7.36    | 1.58-34.38 |
| Psychiatric                 | 5.35            | 2.74-10.45 | 2.90     | 1.33-6.31  | 2.96    | 1.51-5.82  |
| <b>Male</b>                 |                 |            |          |            |         |            |
| Unspecific                  | 1 (ref)         | -          | 1 (ref)  | -          | 1 (ref) | -          |
| MSK, Resp., & GI            | 4.77            | 2.19-10.37 | 1.13     | 0.43-2.93  | 0.50    | 0.24-1.04  |
| Metabolic & Sleep           | 1.95            | 0.90-4.24  | 2.05     | 1.06-3.98  | 0.61    | 0.34-1.09  |
| Sensory & Cancer            | 2.10            | 0.96-4.57  | 1.34     | 0.58-3.09  | 0.43    | 0.15-1.19  |
| Cardio., Anemia, & Dementia | 3.92            | 1.74-8.83  | 0.83     | 0.21-3.31  | 0.10    | 0.02-0.47  |
| Psychiatric                 | 4.29            | 1.57-11.70 | 3.67     | 1.10-12.23 | 0.33    | 0.09-1.17  |
| <b>&lt; 78 years</b>        |                 |            |          |            |         |            |
| Unspecific                  | 1 (ref)         | -          | 1 (ref)  | -          | 1 (ref) | -          |
| MSK, Resp., & GI            | 6.36            | 2.62-15.44 | 1.69     | 0.72-3.96  | 1.56    | 0.93-2.60  |
| Metabolic & Sleep           | 4.09            | 1.59-10.51 | 2.60     | 1.21-5.59  | 1.68    | 0.99-2.85  |
| Sensory & Cancer            | 5.11            | 1.42-18.42 | 1.96     | 0.52-7.44  | 1.59    | 0.64-3.97  |
| Cardio., Anemia, & Dementia | 16.13           | 5.04-51.67 | 4.02     | 0.81-19.94 | 6.70    | 1.66-27.00 |
| Psychiatric                 | 7.35            | 2.58-20.94 | 3.67     | 1.44-9.38  | 2.92    | 1.47-5.80  |
| <b>≥ 78 years</b>           |                 |            |          |            |         |            |
| Unspecific                  | 1 (ref)         | -          | 1 (ref)  | -          | 1 (ref) | -          |
| MSK, Resp., & GI            | 2.51            | 1.58-4.00  | 0.99     | 0.56-1.72  | 0.72    | 0.36-1.43  |
| Metabolic & Sleep           | 1.23            | 0.64-2.36  | 1.77     | 0.93-3.36  | 0.99    | 0.40-2.47  |
| Sensory & Cancer            | 2.00            | 1.27-3.15  | 1.19     | 0.68-2.08  | 2.19    | 0.78-6.12  |
| Cardio., Anemia, & Dementia | 4.09            | 2.57-6.52  | 2.14     | 0.98-4.68  | 4.38    | 0.55-34.69 |
| Psychiatric                 | 4.75            | 2.38-9.46  | 2.88     | 1.03-8.09  | 0.97    | 0.27-3.43  |

Notes: MSK, Resp., & GI = Musculoskeletal, Respiratory, & Gastrointestinal Diseases; Metabolic & Sleep = Metabolic & Sleep Disorders; Sensory & Cancer = Sensory Impairments & Cancer; Cardio., Anemia, & Dementia = Cardiovascular Diseases, Anemia, & Dementia; OR = odds ratio, RRR = relative risk ratio. Model adjusted for age, sex, education, civil status, smoking status, and alcohol consumption. Missing cross-sectional observations: civil status (n=2), education (n=2), smoking status (n=15), alcohol consumption (n=16). Missing six-year observations: education (n=1), civil status (n=2), alcohol consumption (n=8), smoking status (n=11). Missing 12-year observations: education (n=1), civil status (n=1), alcohol consumption (n=9), smoking status (n=10).
